# Supplementary material
Source: PubMed Central journal article supplement (PMC9703942)
Supplement: supplemental_table_2_ddac151.pdf [file supplemental_table_2_ddac151.pdf]

**Supplemental Table 2: Number of Genes with Annotations for Each Database**

| <u>Mutant</u> | <u>Tissue</u> | <u>Timepoint</u> | <u>Upload List</u> | <u>GO:BP</u> | <u>Pathways</u> | <u>MPO</u> | <u>Disease</u> |
|---------------|---------------|------------------|--------------------|--------------|-----------------|------------|----------------|
| <i>Nadk2</i>  | Muscle        | Early            | 557                | 512 (92%)    | 273 (49%)       | 461 (83%)  | 99 (18%)       |
| <i>Nadk2</i>  | Muscle        | Late             | 932                | 737 (79%)    | 408 (44%)       | 604 (65%)  | 135 (15%)      |
| <i>Nadk2</i>  | Brain         | Early            | 5                  | 3 (60%)      | 2 (40%)         | 2 (40%)    | 0 (0%)         |
| <i>Nadk2</i>  | Brain         | Late             | 1                  | 0 (0%)       | 0 (0%)          | 0 (0%)     | 0 (0%)         |
| <i>Pla2g6</i> | Muscle        | Early            | 349                | 325 (93%)    | 167 (48%)       | 295 (85%)  | 63 (18%)       |
| <i>Pla2g6</i> | Muscle        | Late             | 52                 | 49 (94%)     | 32 (62%)        | 43 (83%)   | 12 (23%)       |
| <i>Pla2g6</i> | Brain         | Early            | 14                 | 10 (71%)     | 7 (50%)         | 10 (71%)   | 1 (7%)         |
| <i>Pla2g6</i> | Brain         | Late             | 10                 | 6 (60%)      | 5 (50%)         | 5 (50%)    | 2 (20%)        |

**Supplemental Table 2 – Annotation Statistics for Process and Pathway Enrichment.** Differentially expressed genes with FDR < 0.05 and |Log2FC| > 1.5 for each mutant, tissue, and timepoint were uploaded to MouseMine.org, and annotations for each list were retrieved from the Gene Ontology Biological Process (GO:BP), Reactome Pathways (Pathways), Mammalian Phenotype Ontology (MPO), and Disease Ontology (Disease) databases on December 1, 2021. The number of genes with annotations and the percentage of uploaded genes with annotations are reported for each database / tool.
